# Supplementary material for: Xenopus as a model organism in developmental chemical genetic screens
Source: Royal Society of Chemistry journal article supplement (doi:10.1039/b506103b), 2005-08-05
Supplement: b506103b.pdf [file b506103b.pdf]

**Table S4.** Small molecule compounds assayed for which phenotypes are not shown

| Biochemical Compounds assayed | Commercial supplier | Structure                                                                           |
|-------------------------------|---------------------|-------------------------------------------------------------------------------------|
| Genistein                     | Calbiochem          | 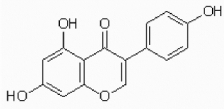   |
| 5150905                       | Chembridge          |    |
| 8160304                       | Chembridge          |    |
| KN-93                         | Calbiochem          |  |
| KT5720                        | Calbiochem          |  |
| staurosporine                 | Calbiochem          |  |

|                          |            |                                                                                     |
|--------------------------|------------|-------------------------------------------------------------------------------------|
| UO126                    | Calbiochem | 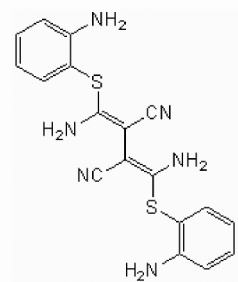   |
| Geldanamycin             | Calbiochem |    |
| Swainsonine              | Calbiochem |    |
| PP1                      | Calbiochem |   |
| PP3                      | Calbiochem |  |
| Etazolate, hydrochloride | Calbiochem |  |

**Table S5.** Small molecule compound 31B4 assayed at the 8–16 cell stage showing phenotypic response to compound concentration

| Compound Concentration | Frog | Phenotypic score |    |    |    |    |
|------------------------|------|------------------|----|----|----|----|
|                        |      | 1                | 2  | 3  | 4  | 5  |
| 2µg/ml                 | A    | 58               | 42 |    |    |    |
|                        | B    | 79               | 21 |    |    |    |
|                        | E    | 52               | 48 |    |    |    |
|                        | F    | 83               | 17 |    |    |    |
| 200ng/ml               | A    | 11               | 28 | 61 |    |    |
|                        | B    |                  |    | 9  | 76 | 15 |
|                        | E    |                  | 47 | 53 |    |    |
|                        | F    |                  | 10 | 90 |    |    |
| 2ng/ml                 | A    |                  |    |    | 21 | 79 |
|                        | B    |                  |    |    | 13 | 87 |
|                        | E    |                  |    | 46 | 54 |    |
|                        | F    |                  |    | 16 | 84 |    |
| 200pg/ml               | A    |                  |    |    | 12 | 88 |
|                        | B    |                  |    |    | 5  | 95 |
|                        | E    |                  |    |    | 20 | 80 |
|                        | F    |                  |    |    | 7  | 93 |
| Negative Control       | A    |                  |    |    | 5  | 95 |
|                        | B    |                  |    |    | 5  | 95 |
|                        | E    |                  |    |    | 4  | 96 |
|                        | F    |                  |    |    | 6  | 94 |

Table S6. Small molecule compound 31B4 assayed at stage 15 showing phenotypic response to compound concentration

| Compound Concentration | Frog | Phenotypic score |    |    |    |    |
|------------------------|------|------------------|----|----|----|----|
|                        |      | 1                | 2  | 3  | 4  | 5  |
| 2µg/ml                 | C    | 83               | 17 |    |    |    |
|                        | D    | 86               | 14 |    |    |    |
|                        | E    | 53               | 47 |    |    |    |
|                        | F    | 83               | 17 |    |    |    |
| 200ng/ml               | C    |                  | 19 | 81 |    |    |
|                        | D    |                  | 30 | 70 |    |    |
|                        | E    |                  | 50 | 50 |    |    |
|                        | F    |                  | 22 | 78 |    |    |
| 2ng/ml                 | C    |                  |    | 31 | 69 |    |
|                        | D    |                  |    | 31 | 69 |    |
|                        | E    |                  |    | 30 | 70 |    |
|                        | F    |                  |    | 58 | 42 |    |
| 200pg/ml               | C    |                  |    |    | 15 | 85 |
|                        | D    |                  |    |    | 22 | 78 |
|                        | E    |                  |    |    | 12 | 88 |
|                        | F    |                  |    |    | 24 | 76 |
| Negative Control       | C    |                  |    |    | 10 | 90 |
|                        | D    |                  |    |    | 12 | 88 |
|                        | E    |                  |    |    | 5  | 95 |
|                        | F    |                  |    |    | 18 | 82 |
